# Supplementary material for: Effects of Sulfur Assimilation in Pseudomonas fluorescens SS101 on Growth, Defense, and Metabolome of Different Brassicaceae
Source: Biomolecules. 2021 Nov 16;11(11):1704. doi: 10.3390/biom11111704 (PMC8615669; doi:10.3390/biom11111704)
Supplement: Supplementary file 1 [file biomolecules-11-01704-s001.zip]

Archive with 4 entries (4 files):
- biomolecules-1410424-rev done-supplementary-figures.pdf
- biomolecules-1410424-rev done-supplementary-Table S6. Metabolite annotation_Arabidopsis (Control, PfSS101, 20H12).xlsx
- biomolecules-1410424-rev done-supplementary-Table S7. Metabolite annotation_Broccoli (Control, PfSS101, 20H12).xlsx
- biomolecules-1410424-rev done-supplementary-tableS1-5.pdf
