# Supplementary material for: Effects of Sulfur Assimilation in Pseudomonas fluorescens SS101 on Growth, Defense, and Metabolome of Different Brassicaceae
Source: Biomolecules. 2021 Nov 16;11(11):1704. doi: 10.3390/biom11111704 (PMC8615669; doi:10.3390/biom11111704)
Supplement: Supplementary file 1 [file biomolecules-11-01704-s001.zip › biomolecules-1410424-rev done-supplementary-Table S6. Metabolite annotation_Arabidopsis (Control, PfSS101, 20H12).xlsx]

## Sheet: Arabidopsis metabolite
Supplementary Table S4. Annotation of Arabidopsis metabolites that showed significant change in their abundance after inoculation with rhizobacteria. Pf SS101: Pseudomonas fluorescens SS101, 20H12: cysH-silent mutant of Pf SS101.
						Observed					in DATA BASE					Fold change
centrotype	MS mode	ct	ANOVA passed	GM #	Cluster numbers in HCA in Fig. 3B	RT(m)	Mass(D)	Compound	KEGG ID	Formula	m/z	mass	Δ ppm*	Classification	data base	Pf SS101	20H12	Ara_cont_1	Ara_cont_2	Ara_cont_3	Ara_cont_4	Ara_20H12_1	Ara_20H12_2	Ara_20H12_3	Ara_20H12_4	Ara_SS101_1	Ara_SS101_2	Ara_SS101_3	Ara_SS101_4
Neg_3294	Neg	3294	402	11	1	19.9151	388.074	Glucocleomin (2-Methylbutyl glucosinolate)	C17257	C12H23NO9S2	[M-H]-	388.074	-0.778202	Aliphatic GLS	magma_kegg	-2.09453	-1.29057	2457740	3080600	3315990	3108120	2274280	2729820	1793900	2471100	1675940	1387860	1397530	1249940
Pos_267	Pos	267	330	9	1	1.58265	175.119	L-Arginine	C00062	C6H14N4O2	[M-H]+	175.119	-0.456832	amino acids	MAGMa_KEGG	-2.14984	-1.13088	275352000	289062000	294850000	285420000	219558000	265152000	275302000	252196000	154773000	121112000	138222000	118345000
Neg_2917	Neg	2917	347	15	1	15.73	380.156	(R)-Pantothenic acid 4'-O-b-D-glucoside	HMDB0033965	C15H27NO10	[M-H]-	380.156	-0.965627	fatty acyl glycosides	MAGMa-HMDB	-4.20371	-1.54967	1522100	2297780	1961890	1916010	1298790	1320430	1120740	1227420	727862	404709	434500	264115
Neg_2687	Neg	2687	344	18	1	11.2618	222.077	N-Acetyl-L-tyrosine	HMDB0000866	C11H13NO4	[M-H]-	222.077	-0.427369	tyrosine and derivatives	MAGMa-HMDB	-3.25229	-1.62998	1442000	2174790	1894140	1694990	1102030	1230920	1096210	991694	782426	508082	508875	416262
Pos_4211	Pos	4211	337	38	2	7.1894	228.05	Stizolobic acid	C06047	C9H9NO6	[M-H]+	228.05	-0.72791	amino acid	MAGMa_KEGG	-2.33167	-1.67887	3145910	3493100	3949760	4254710	2002050	2150360	2608170	2080760	1620330	1324060	1693380	1728260
Neg_626	Neg	626	331	43	2	1.93865	145.062	L-Glutamine/3-Ureidoisobutyrate (C05100)	C00064	C5H10N2O3	[M-H]-	145.062	-1.12366	amino acid	magma_kegg	-2.27374	-1.53947	208554000	224682000	221738000	172806000	130477000	150118000	122175000	134934000	107950000	85360200	87657600	83093500
Neg_2584	Neg	2584	342	37	2	7.06925	138.056	Gabaculine	C12110	C7H9NO2	[M-H]-	138.056	-0.731587	benzoic acid	magma_kegg	-2.31718	-1.62802	2027400	2116950	2457200	3052300	1343370	1431020	1700060	1455360	1018980	880780	1167980	1098460
Pos_7334	Pos	7334	345	30	2	27.6729	395.191	cis-3-Hexenyl b-primeveroside	HMDB0031690	C17H30O10	[M-H]+	395.191	-0.337001	fatty acyl glycosides	MAGMa-HMDB	-3.69841	-1.88437	2670570	4219850	4168690	4599370	2735880	1831350	1753570	1988850	1251450	962691	1050030	969675
Neg_2802	Neg	2802	346	54	2	13.7998	293.124	Ethyl (S)-3-hydroxybutyrate glucoside	HMDB0031693	C12H22O8	[M-H]-	293.124	-0.261596	fatty acyl glycosides	MAGMa-HMDB	-2.42153	-1.73756	3732020	5478990	4445690	4618380	2583980	2725700	2740790	2467190	2493140	1835480	1656380	1561900
Pos_4129	Pos	4129	348	35	2	6.06632	278.123	N-(1-Deoxy-1-fructosyl)proline	HMDB0038493	C11H19NO7	[M-H]+	278.123	-0.16168	proline and derivatives	MAGMa-HMDB	-2.34856	-1.60923	3576740	4180890	3827740	4928070	2466980	2813380	2976350	2004970	1630310	1538410	1559420	2303150
Pos_2783	Pos	2783	333	50	2	2.97814	130.05	5-Oxoproline/ 4-Oxoproline (C01877)/ 1-Pyrroline-4-hydroxy-2-carboxylate (C04282)	C01879	C5H7NO3	[M-H]+	130.05	0.861208		MAGMa_KEGG	-2.05617	-1.6561	42762800	54640700	53002100	47478800	28853100	32409300	32702100	25523700	25932100	25454700	25840000	19012400
Neg_4766	Neg	4766	335	63	2	36.9759	591.172	Di-O-sinapoyl-beta-D-glucoside	C04275	C28H32O14	[M-H]-	591.172	-0.289256	coumaric acids and derivatives	magma_kegg	-2.1718	-1.39747	13501400	11271000	14251700	16535400	8540570	8512620	12422700	10281200	6301370	6316620	6415060	6549200
Pos_9013	Pos	9013	334	62	2	36.968	369.118	O-Feruloylquinic acid	C02572	C17H20O9	[M+H]+	369.118	-0.482231	quinic acids and derivatives	magma_kegg	-2.44258	-1.44658	23735600	21023200	24549500	30801200	14203500	15197100	22757800	17045800	9654780	9777910	10440200	11112200
Neg_2354	Neg	2354	339	78	3	3.89295	450.057	Glucoalyssin (5-methylsulfinylpentyl glucosinolate)	C08400	C13H25O10S3N1	[M-H]-	450.057	-0.406615	Aliphatic GLS	magma_kegg_confirmed	1.17441	2.05957	9756070	9118060	10700900	12198100	23677300	20427400	22981300	18948500	11654300	13260400	12663500	11480400
Neg_2117	Neg	2117	47	#N/A	3	3.17256	436.041	Glucoraphanin (4-Methylsulfinylbutyl glucosinolate)	C08419	C12H23O10S3N1	[M-H]-	436.041	-0.458672	Aliphatic GLS	magma_kegg	1.25984	1.47318	189044000	173796000	201596000	213021000	285998000	286368000	287002000	285966000	213548000	261386000	261307000	243227000
Pos_4519	Pos	4519	338	83	4	12.6667	163.075	Methyl cinnamate	C06358	C10H10O2	[M+H]+	163.075	0.110378	Cinnamic acid derivative	magma_kegg	2.08	-1.361	1082010	1154690	1724580	1595010	904277	1138230	1169590	870413	3231060	3466940	2201670	2657420
Pos_4752	Pos	4752	332	85	4	14.8794	355.102	Scopolin	C01527	C16H18O9	[M+H]+	355.102	-0.228103	Coumarins	magma_kegg	3.28631	-1.37126	398191	304537	896385	426067	294515	469659	410860	301836	1918040	1816340	1275280	1645710
Neg_2860	Neg	2860	351	86	4	14.8875	399.093	Sinapinic acid-O-glucuronide isomer		C17H20O11	[M-H]-	399.093	-1.58981	hydroxycinnamic acid glycosides	magma_HMDB	3.18054	-1.45295	278833	190246	667695	307054	219646	280197	278612	215269	1304750	1289280	914579	1083550
Neg_2751	Neg	2751	341	84	4	12.6589	387.13	Geniposide	C09781	C17H24O10	[M-H]-	387.13	0.74652	Iridoid	magma_kegg	2.13837	-1.38577	1033070	1228380	1866710	1657910	912812	1119040	1181260	962247	3512410	3663990	2363310	2833070
Neg_5073	Neg	5073	340	97	4	50.3484	476.108	8-Methylthiooctyl glucosinolate (8MTO)	C17254	C16H31O9S3N1	[M-H]-	476.109	-0.894753	Aliphatic GLS	magma_kegg_confirmed	2.1237	1.31273	56537300	54583800	60006700	71143500	78778100	77160900	81120600	80976300	135835000	127402000	125526000	125748000
Pos_6439	Pos	6439	422	101	4	23.3217	187.133	3-Oxodecanoic acid		C10H18O3	[M+H]+	187.133	1.2374	medium-chain keto acid	HMDB	16.4921	3.07199	104652	110493	113529	114788	357038	313510	349696	342066	1927700	1834150	1844480	1707280
Neg_3326	Neg	3326	417	121	5	20.4013	492.104	Glucohirsutin (8-Methylsulfinyloctyl glucosinolate)	C17271	C16H31O10S3N1	[M-H]-	492.104	-0.422675	Aliphatic GLS	magma_kegg_confirmed	4.48198	3.4949	20043500	15199800	20043500	22686200	73284200	61957200	68433300	68833500	89504400	83954700	97167800	78846600
Pos_9621	Pos	9621	420	117	5	42.5497	201.048	Camalexin		C11H8N2S	[M+H]+	201.047	2.17163	Alkaloid	magma_PubChem	20.5129	17.3073	702367	3356940	1176160	855773	12108400	30790800	33980800	28543100	26809600	21460500	55160000	21518700
Pos_9689	Pos	9689	414	118	5	43.9949	176.071	Indole-3-acetic acid (IAA)	C00954	C10H9NO2	[M+H]+	176.071	0.238541	Alkaloid	magma_kegg	8.40167	6.92215	50752	93420	50071	45654	294880	390488	549475	425761	371560	333448	727827	582700
Neg_2693	Neg	2693	415	120	5	11.3432	275.151	p-Coumaroylagmatine II	C04498	C14H20N4O2	[M-H]-	275.151	0.0472467	Coumaric acid and derivatives	magma_kegg	3.15267	2.20622	182194	164411	192485	315547	539011	364591	519334	462582	624707	748232	737844	583605
Neg_3453	Neg	3453	416	110	5	21.6893	135.045	Phenylacetic acid	C07086	C8H8O2	[M-H]-	135.046	-5.84986	phenylacetic acid	magma_kegg	2.20944	2.80764	50816	40460	151217	214680	321304	339100	408193	214982	146576	293142	328882	241496
