# Supplementary material for: Effects of Sulfur Assimilation in Pseudomonas fluorescens SS101 on Growth, Defense, and Metabolome of Different Brassicaceae
Source: Biomolecules. 2021 Nov 16;11(11):1704. doi: 10.3390/biom11111704 (PMC8615669; doi:10.3390/biom11111704)
Supplement: Supplementary file 1 [file biomolecules-11-01704-s001.zip › biomolecules-1410424-rev done-supplementary-Table S7. Metabolite annotation_Broccoli (Control, PfSS101, 20H12).xlsx]

## Sheet: Broccoli metabolite
Supplementary Table S5. Annotation of Broccoli metabolites that showed significant change in their abundance after inoculation with rhizobacteria. Pf SS101: Pseudomonas fluorescens SS101, 20H12: cysH-silent mutant of Pf SS101.
																												Fold change
				Observed					in DATA BASE																			Coronado		Malibu
clusterId	centrotype	# in hierarchical cluster analysis (HCA)	Cluster numbers in HCA in Fig. 4B	RT(m)	Mass(D)	Compound	KEGG ID	Formula	m/z	mass	Δ ppm*	Classification	Identificaiton level	data base	Remark	Av_C-C	Av_C-SS101	Av_C-20H12	Av_M-C	Av_M-SS101	Av_M-20H12	SE_C-C	SE_C-SS101	SE_C-20H12	SE_M-C	SE_M-SS101	SE_M-20H12	Pf SS101	20H12	Pf SS101	20H12	Cor-Control-R1	Cor-Control-R2	Cor-Control-R3	Cor-Control-R4	Cor-SS101-R1	Cor-SS101-R2	Cor-SS101-R3	Cor-SS101-R4	Cor-20H12-R1	Cor-20H12-R2	Cor-20H12-R3	Cor-20H12-R4	Mal-Control-R1	Mal-Control-R2	Mal-Control-R3	Mal-Control-R4	Mal-SS101-R1	Mal-SS101-R2
68	Neg_3555	15	1	1.84471	154.062	Histidine	C00768	C6H9N3O2	[M-H]-	154.063	-2.85598	amino acid	2	magma_kegg, Metlin (experimental mass confirmed)		8.9786e+07	4.32438e+07	6.16522e+07	8.16818e+07	4.02599e+07	6.24361e+07	2.36839e+06	3.36078e+06	855512	2.54724e+06	865796	4.17971e+06	-2.07627	-1.45633	-2.02886	-1.30825	8.6854e+07	8.67015e+07	9.67377e+07	8.88509e+07	3.88405e+07	3.85029e+07	4.27237e+07	5.29083e+07	6.04289e+07	6.14616e+07	6.4127e+07	6.05913e+07	8.39806e+07	7.46668e+07	8.15654e+07	8.65144e+07	3.89616e+07	4.08403e+07
21	Pos_1208	17	1	1.6241	175.119	Arginine	C02385	C6H14N4O2	[M+H]+	175.119	1.29055	amino acid	2	magma_kegg		1.11001e+09	4.92442e+08	8.096e+08	1.01094e+09	5.10125e+08	7.97703e+08	4.25536e+07	4.91061e+07	1.79139e+07	3.25768e+07	1.7047e+07	6.06429e+07	-2.2541	-1.37106	-1.98175	-1.26731	1.05373e+09	1.12128e+09	1.22585e+09	1.03919e+09	4.30443e+08	4.10391e+08	5.01276e+08	6.27655e+08	8.18302e+08	7.56704e+08	8.32205e+08	8.31191e+08	1.02156e+09	9.36054e+08	9.93318e+08	1.09282e+09	4.60807e+08	5.14448e+08
153	Neg_6859	43	1	2.98159	188.057	N-Acetyl-L-glutamic acid	C00624	C7H11NO5	[M-H]-	188.057	-2.16955	glutamic acid and derivatives	2	magma_kegg		1.19633e+07	3.02974e+06	5.31444e+06	1.36579e+07	4.58652e+06	7.3516e+06	990995	286083	634835	935332	452696	658306	-3.94863	-2.2511	-2.97784	-1.85782	1.07954e+07	1.16888e+07	1.48415e+07	1.05276e+07	2.70804e+06	2.39432e+06	3.4166e+06	3.60001e+06	6.33175e+06	4.01504e+06	4.43739e+06	6.47359e+06	1.35731e+07	1.10419e+07	1.50192e+07	1.49976e+07	3.52567e+06	4.2724e+06
107	Neg_5375	38	1	2.16113	175.047	Allantoic acid	C00499	C4H8N4O4	[M-H]-	175.047	-1.78238	n-carbamoyl-alpha amino acids	2	magma_kegg		5.63195e+07	1.2003e+07	2.77716e+07	6.19705e+07	2.06647e+07	3.52068e+07	3.1744e+06	3.03755e+06	1.33833e+06	4.46801e+06	3.45382e+06	3.85342e+06	-4.69213	-2.02795	-2.99886	-1.76019	5.58485e+07	6.53415e+07	5.32155e+07	5.08726e+07	8.83099e+06	7.18781e+06	1.12229e+07	2.07702e+07	3.01682e+07	2.42764e+07	2.95313e+07	2.71104e+07	6.1625e+07	5.38302e+07	7.4495e+07	5.79319e+07	1.4354e+07	2.50442e+07
103	Neg_5250	36	1	2.14617	351.103	Benzylpenicilloic acid	C16672	C16H20N2O5S	[M-H]-	351.102	1.5551	penicilloic acid	2	magma_kegg		2.04203e+07	5.6315e+06	7.857e+06	2.098e+07	6.29243e+06	9.56152e+06	1.30739e+06	366064	489951	1.91114e+06	146755	1.10247e+06	-3.62609	-2.599	-3.33417	-2.19422	1.88377e+07	2.20218e+07	2.31896e+07	1.76323e+07	5.5918e+06	4.61837e+06	6.04437e+06	6.27146e+06	8.84906e+06	6.5145e+06	8.16015e+06	7.90429e+06	2.25215e+07	1.56011e+07	2.45045e+07	2.12931e+07	6.5284e+06	5.89312e+06
169	Neg_7370	46	1	3.19747	152.986	3-Sulfolactaldehyde	C20798	C3H6O5S	[M-H]-	152.986	0.424875	sulfuric acid	2	magma_kegg		2.46887e+06	301108	549607	3.67364e+06	457502	1.20084e+06	190096	36225.4	118536	649159	39293.3	400656	-8.1993	-4.49207	-8.02979	-3.05924	2.86265e+06	2.28181e+06	2.69884e+06	2.03218e+06	299940	223694	282667	398129	896212	506626	381480	414111	2.93984e+06	2.22298e+06	4.64748e+06	4.88428e+06	487736	356664
140	Pos_5955	177	2	3.14448	166.087	Phenylalanine	C02057	C9H11NO2	[M+H]+	166.086	0.75005	Amino acid	2	MAGMa_KEGG		2.28757e+08	1.51233e+08	1.37141e+08	3.68033e+08	2.40814e+08	1.75817e+08	3.76175e+07	4.14695e+06	3.42476e+06	4.06454e+07	6.54615e+06	1.85755e+07	-1.51261	-1.66805	-1.52829	-2.09328	2.93737e+08	1.59097e+08	2.93926e+08	1.68267e+08	1.53705e+08	1.61262e+08	1.48264e+08	1.41701e+08	1.29241e+08	1.40292e+08	1.4486e+08	1.34169e+08	4.45189e+08	2.62769e+08	4.16699e+08	3.47475e+08	2.39339e+08	2.2829e+08
225	Pos_8793	178	2	6.54402	205.097	Tryptophan	C00806	C11H12N2O2	[M+H]+	205.097	0.706982	amino acid	2	magma_kegg		9.18325e+07	3.95648e+07	2.87571e+07	1.34684e+08	7.52834e+07	3.55763e+07	1.57522e+07	1.05316e+06	1.01693e+06	1.9961e+07	1.52685e+06	5.41982e+06	-2.32107	-3.19339	-1.78902	-3.78577	1.18918e+08	7.44708e+07	1.17754e+08	5.6187e+07	3.9301e+07	3.73684e+07	4.24365e+07	3.91534e+07	2.81744e+07	2.62386e+07	3.09856e+07	2.96297e+07	1.87704e+08	9.14602e+07	1.34976e+08	1.24594e+08	7.10277e+07	7.56236e+07
1282	Pos_45785	73	2	43.179	631.276	Brassica napus non-fluorescent chlorophyll catabolite 3	HMDB40917	C34H38N4O8	[M+H]+	631.276	0.297474	tetrapyrroles and derivatives	2	magma_HMDB		2.12192e+06	479977	561835	4.46504e+06	2.37841e+06	2.06606e+06	306692	120934	87747.8	1.10687e+06	230504	284646	-4.42087	-3.77676	-1.87733	-2.16114	2.93421e+06	2.24497e+06	1.56393e+06	1.74455e+06	348004	393471	337490	840944	531825	665673	722389	327452	2.67185e+06	3.97729e+06	7.68484e+06	3.5262e+06	2.54009e+06	1.69701e+06
380	Pos_14755	202	4	15.8248	193.05	Scopoletin, Isoscopoletin, 4-METHYLDAPHNETIN, 5,7-DIHYDROXY-4-METHYLCOUMARIN (Coumarins)	C01752	C10H8O4	[M+H]+	193.05	0.238281	Coumarin	2	magma_kegg		19695.1	2217.46	40628.9	2084.84	40360.5	13627	10237.6	184.503	12944	99.7585	17296.9	5092.29	-8.88181	2.06289	19.359	6.53624	2132.24	2512.95	32046.7	42088.4	1834.43	1999.49	2388.23	2647.7	57126.2	2665.79	45581.8	57141.7	2035.79	1856.73	2108.19	2338.68	2320.96	67439
205	Pos_8175	250	5	5.76115	298.097	Methylthioadenosine	C00170	C11H15N5O3S	[M+H]+	298.097	0.161021	5'-deoxy-5'-thionucleosides	2	magma_kegg		2.91964e+06	6.17399e+06	4.24983e+06	3.21129e+06	5.61688e+06	3.83384e+06	366900	717308	482068	491856	169878	447211	2.11464	1.4556	1.7491	1.19386	2.94252e+06	2.0382e+06	3.83336e+06	2.86449e+06	7.40274e+06	5.81471e+06	7.18104e+06	4.29747e+06	4.8777e+06	4.22768e+06	2.89566e+06	4.99829e+06	4.18103e+06	2.73382e+06	2.06695e+06	3.86335e+06	5.86059e+06	5.93542e+06
95	Neg_4865	451	5	2.04153	132.03	Aspartic acid	C16433	C4H7NO4	[M-H]-	132.031	-2.83267	amino acid	2	magma_kegg		1.18082e+08	4.10607e+08	2.47495e+08	9.81335e+07	2.59512e+08	2.05015e+08	8.09753e+06	3.97409e+07	1.2086e+07	5.13614e+06	3.81877e+07	2.46076e+07	3.47731	2.09596	2.64448	2.08914	1.40928e+08	1.15318e+08	1.13314e+08	1.02767e+08	4.11017e+08	5.15969e+08	3.91311e+08	3.24129e+08	2.22971e+08	2.70992e+08	2.6531e+08	2.30704e+08	9.63515e+07	1.13151e+08	9.18772e+07	9.1154e+07	3.68917e+08	2.02906e+08
456	Neg_14200	416	5	17.7937	278.067	N-[4'-hydroxy-(E)-cinnamoyl]-L-aspartic acid	HMDB29234	C13H13NO6	[M-H]-	278.067	1.22577	aspartic acid and derivatives	2	magma_HMDB		144689	479921	273176	332797	773744	451334	10732.3	27297.8	13750.5	14830	33581.8	31656.1	3.31691	1.88802	2.32497	1.35618	135670	148483	172529	122075	459162	478191	555413	426920	235606	287049	298885	271165	347162	293606	328055	362366	855060	708391
350	Neg_12135	444	5	13.4968	299.077	4-(beta-D-Glucosyloxy)benzoate	C03993	C13H16O8	[M-H]-	299.077	0.66538	Benzoic acid and derivatives	2	magma_kegg		268013	1.07241e+07	434900	2.21263e+06	1.10487e+07	1.54104e+06	99165	915966	157921	389365	2.17398e+06	185848	40.0133	1.62268	4.99345	-1.4358	434456	407650	224430	5518.45	1.31144e+07	1.11986e+07	9.40466e+06	9.17872e+06	576427	813942	180570	168660	2.95769e+06	1.57608e+06	1.50528e+06	2.81147e+06	7.19178e+06	8.65132e+06
116	Neg_5678	261	5	2.22071	175.025	Ascorbic acid	C00072	C6H8O6	[M-H]-	175.025	-1.22497	butenolides	2	MAGMa-KEGG		1.53804e+08	4.12779e+08	3.73157e+08	1.67622e+08	3.87383e+08	3.73655e+08	1.43861e+07	4.3519e+07	1.55784e+07	1.24272e+07	6.05161e+06	2.01889e+07	2.6838	2.42618	2.31105	2.22915	1.60228e+08	1.73809e+08	1.11497e+08	1.69683e+08	4.71421e+08	5.03175e+08	3.40555e+08	3.35965e+08	3.85511e+08	4.09525e+08	3.59978e+08	3.37615e+08	1.77472e+08	1.91036e+08	1.69082e+08	1.32897e+08	4.03192e+08	3.7492e+08
92	Pos_4373	263	5	2.24299	177.04	Ascorbic acid	C00072	C6H8O6	[M+H]+	177.039	2.02215	butenolides	2	magma_kegg		1.81489e+07	8.22487e+07	6.60129e+07	3.91679e+07	9.97296e+07	8.45065e+07	5.53972e+06	1.14561e+06	4.04147e+06	2.63551e+06	2.6735e+06	3.47132e+06	4.53188	3.63729	2.5462	2.15754	2.71351e+07	2.81913e+07	6.95891e+06	1.03103e+07	8.54655e+07	8.08139e+07	8.22945e+07	8.04209e+07	5.90979e+07	6.73195e+07	7.69026e+07	6.07316e+07	3.48142e+07	4.49077e+07	4.23794e+07	3.45704e+07	9.97868e+07	1.07258e+08
204	Neg_8605	425	5	4.32829	173.009	Dehydroascorbic acid	C05422	C6H6O6	[M-H]-	173.01	-3.12699	butenolides	2	magma_kegg		612162	2.06647e+06	1.2034e+06	1.04273e+06	2.65723e+06	1.82988e+06	28963.1	114259	126452	170025	118157	181496	3.37569	1.96582	2.54834	1.75489	684639	629229	583407	551373	2.35401e+06	2.08185e+06	1.79697e+06	2.03305e+06	1.08685e+06	1.5792e+06	1.11542e+06	1.03214e+06	1.49476e+06	776192	1.11479e+06	785178	2.98247e+06	2.53963e+06
458	Neg_14252	503	5	17.9117	385.114	1-O-Sinapoyl beta-D-glucoside	C01175	C17H22O10	[M-H]-	385.114	1.0023	coumaric acids and derivatives	2	magma_kegg		595684	2.18642e+06	974769	645153	1.32764e+06	766400	77461.1	204044	89751.4	22497.5	120995	68457.2	3.67044	1.63639	2.05786	1.18794	641518	666563	707720	366935	2.33075e+06	2.0768e+06	2.65185e+06	1.68628e+06	751321	1.04837e+06	1.17235e+06	927034	677689	579684	651964	671276	1.68664e+06	1.18963e+06
420	Pos_16326	363	5	17.2155	355.103	Scopolin/ Chlorogenic acid (C00852)/ Biflorin (C08996)	C01527	C16H18O9	[M+H]+	355.102	0.802585	coumarin	2	magma_kegg	candidate scores are >5.6	4.55913e+06	1.41228e+07	6.68323e+06	5.66787e+06	1.32041e+07	7.82842e+06	335689	864913	253935	133292	588654	335431	3.09769	1.4659	2.32963	1.38119	4.70803e+06	5.31415e+06	3.68796e+06	4.5264e+06	1.57306e+07	1.34421e+07	1.53173e+07	1.20011e+07	6.16742e+06	7.02905e+06	7.20048e+06	6.33596e+06	5.86085e+06	5.35863e+06	5.5342e+06	5.9178e+06	1.49653e+07	1.26761e+07
865	Neg_22710	368	5	33.3309	577.157	Daidzein 4',7-diglucoside	HMDB0033992	C27H30O14	[M-H]-	577.156	1.0055	flavonoid	2	magma_HMDB		236798	1.23808e+06	506881	415709	1.20212e+06	617723	21855.4	67961.7	52354.5	39041.2	69443.1	70783.2	5.22843	2.14056	2.89172	1.48595	278606	252986	239738	175861	1.2178e+06	1.26589e+06	1.39896e+06	1.06968e+06	433210	573689	617498	403127	528742	381668	351358	401068	1.38673e+06	1.15561e+06
925	Neg_24227	371	5	35.4355	723.215	Flavonol 3-O-beta-D-glucosyl-(1->2)-beta-D-glucosyl-(1->2)-beta-D-glucoside	C15582	C33H40O18	[M-H]-	723.214	1.36336	flavonoid	2	magma_kegg		9.66569e+06	4.16635e+07	2.00825e+07	1.63058e+07	4.44933e+07	2.52556e+07	487424	2.19533e+06	1.25062e+06	757719	1.61553e+06	1.92675e+06	4.31046	2.07771	2.72868	1.54887	1.02275e+07	1.04383e+07	9.72238e+06	8.27458e+06	3.99843e+07	4.34922e+07	4.66711e+07	3.65066e+07	1.78753e+07	1.92132e+07	2.36712e+07	1.95701e+07	1.84805e+07	1.59196e+07	1.49577e+07	1.58654e+07	4.88987e+07	4.14731e+07
530	Neg_16169	408	5	20.7736	947.247	Kaempferol 3-(2-feruloylsophoroside) 7-glucoside	HMDB40801	C43H48O24	[M-H]-	947.246	1.22517	flavonoid	2	magma_HMDB		2.0022e+06	4.80754e+06	2.35534e+06	2.91496e+06	6.5772e+06	3.86828e+06	210892	267048	188220	145651	196701	178680	2.40113	1.17637	2.25636	1.32704	1.68957e+06	2.30212e+06	2.42445e+06	1.59266e+06	4.70263e+06	4.87798e+06	5.47254e+06	4.177e+06	1.86038e+06	2.61865e+06	2.67607e+06	2.26624e+06	3.30339e+06	2.94508e+06	2.61851e+06	2.79287e+06	7.14329e+06	6.31765e+06
526	Pos_20119	354	5	20.3382	611.161	Kaempferol 3-O-beta-D-sophoroside/ Rutin (C05625)/ Multinoside A (C17563)	C12634	C27H30O16	[M+H]+	611.161	-0.152169	Flavonoid	2	magma_kegg		1.27096e+06	4.68954e+06	2.21424e+06	1.77449e+06	4.69597e+06	2.69865e+06	210569	254754	178642	82395.7	317692	136979	3.68976	1.74218	2.64638	1.52081	1.52089e+06	673543	1.60646e+06	1.28296e+06	4.80209e+06	4.77395e+06	5.19917e+06	3.98295e+06	1.99631e+06	2.50557e+06	2.52961e+06	1.82548e+06	2.01078e+06	1.6623e+06	1.66073e+06	1.76414e+06	5.62752e+06	4.23632e+06
448	Pos_17353	322	5	17.9874	935.246	Kaempferol 3-O-caffeoyl-sophoroside 7-O-glucoside/ Quercetin 3-[p-coumaroyl-(->6)-glucosyl-(1->2)-glucosyl-(1->2)-glucoside]	HMDB0029268	C42H46O24	[M+H]+	935.245	0.848548	flavonoid	2	magma_HMDB		5.35943e+06	1.14627e+07	6.31361e+06	4.72133e+06	1.39476e+07	7.94572e+06	258212	736873	387959	160064	1.00179e+06	657442	2.13878	1.17804	2.95417	1.68294	4.92394e+06	5.88352e+06	5.72245e+06	4.9078e+06	1.20785e+07	1.04173e+07	1.32509e+07	1.0104e+07	6.17462e+06	6.85174e+06	6.95593e+06	5.27213e+06	5.09487e+06	4.80824e+06	4.32625e+06	4.65598e+06	1.68049e+07	1.37627e+07
539	Pos_20704	328	5	20.7816	949.262	Kaempferol 3-sophoroside 7-(2-feruloylglucoside)/ Kaempferol 3-(2-feruloylsophoroside) 7-glucoside/ Kaempferol 3-O-feruloyl-sophoroside 7-O-glucoside	HMDB0038762	C43H48O24	[M+H]+	949.261	0.809615	flavonoid	3	magma_HMDB		3.40325e+06	7.87592e+06	4.02736e+06	3.34683e+06	8.92151e+06	4.62634e+06	272528	365243	258441	129544	513024	223880	2.31423	1.18339	2.66566	1.3823	3.12526e+06	3.70555e+06	3.99206e+06	2.79015e+06	7.55018e+06	8.10257e+06	8.77353e+06	7.07739e+06	3.40621e+06	4.52124e+06	4.37705e+06	3.80494e+06	3.70566e+06	3.10989e+06	3.35316e+06	3.21861e+06	1.04477e+07	8.23104e+06
789	Neg_21355	360	5	30.4835	739.211	Mauritianin	HMDB40562	C33H40O19	[M-H]-	739.209	2.31586	Flavonoid	2	magma_HMDB		644395	2.16187e+06	1.08583e+06	828942	2.15613e+06	1.15078e+06	45906.9	137554	98310.5	44795.7	30217	95402.1	3.35489	1.68504	2.60106	1.38825	594202	726618	716405	540356	2.09009e+06	2.06573e+06	2.56092e+06	1.93075e+06	900875	1.14253e+06	1.33749e+06	962444	734838	866920	935130	778880	2.23487e+06	2.15952e+06
459	Neg_14337	323	5	17.9793	933.231	Quercetin 3-[p-coumaroyl-(->6)-glucosyl-(1->2)-glucosyl-(1->2)-glucoside]	HMDB37938	C42H46O24	[M-H]-	933.231	0.746439	flavonoid	2	magma_HMDB		3.63483e+06	8.26509e+06	4.23732e+06	2.91219e+06	9.29981e+06	5.31198e+06	325183	490083	315039	147396	652896	323093	2.27386	1.16575	3.19341	1.82405	3.5386e+06	4.38796e+06	3.7946e+06	2.81817e+06	8.28791e+06	8.03571e+06	9.55322e+06	7.18354e+06	3.63804e+06	4.99073e+06	4.51545e+06	3.80504e+06	3.21602e+06	2.85082e+06	2.53092e+06	3.05099e+06	1.1131e+07	8.96281e+06
779	Neg_21183	355	5	30.136	739.211	Robinin	C10178	C33H40O19	[M-H]-	739.209	2.12254	flavonoid	2	magma_kegg		2.99911e+06	1.62455e+07	7.42197e+06	4.79029e+06	1.42367e+07	7.09381e+06	220015	1.32145e+06	666351	265091	915077	786407	5.41677	2.47473	2.97198	1.48087	2.96791e+06	3.62998e+06	2.73167e+06	2.66687e+06	1.50113e+07	1.56001e+07	2.0122e+07	1.42485e+07	5.8083e+06	7.77695e+06	9.00163e+06	7.10102e+06	4.56011e+06	4.53737e+06	5.58395e+06	4.47975e+06	1.57305e+07	1.36873e+07
521	Neg_15873	369	5	20.33	609.147	Rutin	C05625	C27H30O16	[M-H]-	609.146	0.891412	Flavonoid	2	magma_kegg		635812	2.13606e+06	943043	758258	2.28866e+06	1.24875e+06	59500.3	99133.7	106976	24905	175452	88079.6	3.35958	1.48321	3.01831	1.64687	625924	802313	592143	522869	2.13549e+06	2.22824e+06	2.31965e+06	1.86087e+06	784821	1.01574e+06	1.21313e+06	758486	826471	727196	763507	715859	2.79735e+06	1.99506e+06
742	Neg_20463	356	5	28.871	665.174	sudachiin B/ sudachiin C	HMDB39087	C30H34O17	[M-H]-	665.172	1.89475	flavonoid	2	magma_HMDB		662387	3.33626e+06	1.35691e+06	646563	3.41327e+06	1.45079e+06	35834	370629	105974	28789.4	157208	148579	5.03672	2.04851	5.2791	2.24385	725377	722641	590376	611152	2.73483e+06	3.16859e+06	4.41464e+06	3.02696e+06	1.13429e+06	1.41094e+06	1.6257e+06	1.2567e+06	648117	720306	580013	637817	3.88215e+06	3.2451e+06
1005	Neg_25690	347	5	38.85	561.162	Flavonol 3-O-beta-D-glucosyl-(1->2)-beta-D-glucoside	C15581	C27H30O13	[M-H]-	561.161	1.29018	Flavonoids	2	magma_kegg		134891	1.38457e+06	541855	248585	1.34727e+06	624621	20486.8	178062	71091.7	30146.1	88406.1	98389.1	10.2644	4.01699	5.41976	2.51271	189604	142890	106045	101024	1.17393e+06	1.82334e+06	1.51295e+06	1.02805e+06	451742	609635	707430	398612	337492	229559	203711	223578	1.60066e+06	1.32559e+06
341	Pos_13593	315	5	14.5577	773.213	Kaempferol 3-sophorotrioside	C12635	C33H40O21	[M+H]+	773.213	-0.519908	Flavonoids	2	magma_kegg		2.16079e+06	4.95694e+06	2.42297e+06	2.86349e+06	4.97456e+06	3.38946e+06	105941	321057	132933	47521.6	263499	50449.3	2.29404	1.12134	1.73723	1.18368	2.23736e+06	2.26525e+06	2.29558e+06	1.84498e+06	5.09442e+06	4.36934e+06	5.80307e+06	4.56094e+06	2.16507e+06	2.54903e+06	2.73482e+06	2.24297e+06	3.00217e+06	2.81342e+06	2.79239e+06	2.84599e+06	5.67301e+06	4.6388e+06
880	Neg_23011	348	5	33.9327	547.147	Puerarin xyloside	C17057	C26H28O13	[M-H]-	547.146	1.612	Flavonoids	2	magma_kegg		94128.5	1.20484e+06	326282	196796	1.24919e+06	513709	12260.4	123580	51158.9	19590.8	81306.5	76792.3	12.8	3.46634	6.34762	2.61036	122451	96312.3	95178	62572.6	1.11994e+06	1.51267e+06	1.26137e+06	925378	272848	433751	387417	211110	213844	182740	149952	240648	1.46298e+06	1.28851e+06
112	Neg_5496	280	5	2.18354	289.033	Sedoheptulose phosphate/ D-glycero-D-manno-Heptose phosphate (C19882)	C05382	C7H15O10P	[M-H]-	289.033	0.515512	hexose phosphates	2	magma_kegg		5.76207e+06	2.36679e+07	1.14976e+07	7.45439e+06	2.91544e+07	1.21675e+07	419068	3.1751e+06	1.0731e+06	466104	3.52142e+06	1.47445e+06	4.10754	1.99539	3.91104	1.63226	6.20422e+06	6.67847e+06	4.8096e+06	5.35597e+06	1.75318e+07	2.70464e+07	3.08823e+07	1.92112e+07	1.10574e+07	8.7409e+06	1.37726e+07	1.24195e+07	6.33019e+06	8.42983e+06	7.96504e+06	7.09251e+06	3.68557e+07	2.68994e+07
1028	Neg_26176	489	5	40.017	929.274	2-Feruloyl-1,2'-disinapoylgentiobiose	HMDB0030336	C44H50O22	[M-H]-	929.272	1.57404	hydroxycinnamic acid glycosides	2	magma_HMDB		4.78237e+06	1.22798e+07	6.0536e+06	4.58775e+06	1.03136e+07	6.31163e+06	438887	829041	719377	103592	455011	228458	2.56771	1.26581	2.24807	1.37576	4.39872e+06	5.34628e+06	5.64881e+06	3.73568e+06	1.09632e+07	1.41835e+07	1.31519e+07	1.08205e+07	4.51381e+06	5.87711e+06	7.99228e+06	5.8312e+06	4.65793e+06	4.39774e+06	4.84838e+06	4.44697e+06	1.15859e+07	1.02443e+07
509	Neg_15575	506	5	19.848	355.104	1-O-Feruloyl-beta-D-glucose	C17759	C16H20O9	[M-H]-	355.103	-0.43245	hydroxycinnamic acids	2	MAGMa-KEGG		6.04206e+06	1.94878e+07	9.4132e+06	6.76384e+06	1.19647e+07	9.45045e+06	371337	1.40503e+06	552226	320464	962205	558786	3.22535	1.55795	1.76891	1.3972	6.84857e+06	5.8605e+06	6.35248e+06	5.10669e+06	2.32073e+07	1.83348e+07	1.98218e+07	1.65872e+07	8.8455e+06	1.01071e+07	1.05433e+07	8.15684e+06	7.68703e+06	6.34515e+06	6.31473e+06	6.70846e+06	1.46552e+07	1.18228e+07
286	Pos_11691	270	5	11.3958	181.05	Caffeic acid (aglycon of C10431)	C01197	C9H8O4	[M+H]+	181.05	0.839549	hydroxycinnamic acids	2	magma_kegg		5.90962e+06	1.91076e+07	1.20941e+07	7.97956e+06	1.60443e+07	1.3847e+07	388087	653151	1.13396e+06	227245	1.31917e+06	843992	3.2333	2.04651	2.01067	1.73531	7.07342e+06	5.54881e+06	5.49525e+06	5.52099e+06	1.97739e+07	2.04861e+07	1.867e+07	1.75003e+07	1.10372e+07	1.32027e+07	1.46258e+07	9.51054e+06	7.97035e+06	8.5565e+06	7.94627e+06	7.44511e+06	1.94906e+07	1.67182e+07
311	Neg_11160	268	5	11.4219	341.088	Caffeic acid 3-glucoside (C10431)/ 1-Caffeoyl-beta-D-glucose (C10433)	C10431	C15H18O9	[M-H]-	341.088	0.732949	hydroxycinnamic acids	2	magma_kegg		8.10859e+06	2.38552e+07	1.52148e+07	1.00304e+07	1.98044e+07	1.68375e+07	404357	800296	873460	902201	1.41759e+06	441672	2.94196	1.87638	1.97444	1.67865	9.1218e+06	7.53274e+06	8.39401e+06	7.38581e+06	2.48142e+07	2.53765e+07	2.34443e+07	2.17857e+07	1.47702e+07	1.67169e+07	1.64386e+07	1.29336e+07	1.11124e+07	1.06647e+07	7.33898e+06	1.10055e+07	2.32834e+07	2.09485e+07
473	Pos_18274	509	5	18.7445	195.065	Ferulic acid	C01494	C10H10O4	[M+H]+	195.065	0.830492	hydroxycinnamic acids	2	magma_kegg		2.32266e+07	7.31859e+07	3.91173e+07	2.62448e+07	4.62332e+07	3.55037e+07	1.35413e+06	3.20757e+06	2.03012e+06	779132	3.32896e+06	1.77797e+06	3.15095	1.68416	1.76162	1.35279	2.67469e+07	2.1921e+07	2.37707e+07	2.04678e+07	7.53326e+07	8.06388e+07	7.13214e+07	6.54508e+07	3.65313e+07	4.08585e+07	4.39771e+07	3.51023e+07	2.7998e+07	2.62011e+07	2.42179e+07	2.65621e+07	5.50743e+07	4.75717e+07
513	Pos_19589	521	5	19.8859	195.065	Ferulic acid	C01494	C10H10O4	[M+H]+	195.065	0.676697	hydroxycinnamic acids	2	magma_kegg		3.0159e+06	6.50798e+06	4.78734e+06	3.29245e+06	4.45865e+06	4.91968e+06	95710.4	270903	320050	116706	281286	445018	2.15789	1.58737	1.3542	1.49423	3.01302e+06	3.28703e+06	2.89633e+06	2.8672e+06	7.29555e+06	6.42134e+06	6.09732e+06	6.21772e+06	4.64381e+06	5.00179e+06	5.51349e+06	3.99028e+06	3.33549e+06	3.16664e+06	3.60061e+06	3.06706e+06	4.97081e+06	4.76739e+06
403	Pos_15603	415	5	16.678	225.076	Sinapic acid	C00482	C11H12O5	[M+H]+	225.076	0.266577	hydroxycinnamic acids	2	magma_kegg		2.90397e+06	5.87879e+06	3.49549e+06	4.65667e+06	8.34584e+06	5.41738e+06	176635	294407	196947	41588.8	294329	221266	2.0244	1.20369	1.79223	1.16336	2.87104e+06	3.05315e+06	3.26076e+06	2.43094e+06	5.76361e+06	5.6204e+06	6.73277e+06	5.39839e+06	3.26849e+06	3.35877e+06	4.08299e+06	3.27169e+06	4.70513e+06	4.59626e+06	4.57695e+06	4.74834e+06	9.14336e+06	8.42495e+06
713	Neg_19833	514	5	27.7955	477.065	4-Methoxyglucobrassicin (4-Methoxy-3-indolylmethyl glucosinolate)	C08423	C17H22N2O10S2	[M-H]-	477.064	0.718981	Indolic GLS	2	magma_kegg		6.55792e+07	1.50706e+08	5.82657e+07	6.2996e+07	1.06394e+08	6.11583e+07	4.72324e+06	8.54523e+06	2.76566e+06	2.91358e+06	3.00242e+06	5.36745e+06	2.29808	-1.12552	1.6889	-1.03005	6.69118e+07	6.51178e+07	7.66618e+07	5.36253e+07	1.54031e+08	1.52443e+08	1.68783e+08	1.27567e+08	5.1356e+07	6.48963e+07	5.85449e+07	5.82658e+07	6.534e+07	5.49449e+07	6.30866e+07	6.86125e+07	1.02804e+08	1.0664e+08
576	Pos_21820	505	5	21.7154	369.111	Desulfoglucobrassicin (Indolylmethyl-desulfoglucosinolate)	C16517	C16H20N2O6S	[M+H]+	369.111	-0.0704394	indolic GLS	2	magma_kegg		1.79234e+07	6.93046e+07	3.20655e+07	1.34193e+07	4.44451e+07	2.49407e+07	1.19956e+06	2.79655e+06	2.90573e+06	1.18475e+06	1.34327e+06	1.61059e+06	3.8667	1.78902	3.31204	1.85857	1.93918e+07	1.75596e+07	2.00516e+07	1.46908e+07	7.35984e+07	7.29649e+07	6.9225e+07	6.14301e+07	2.60638e+07	3.66347e+07	3.74398e+07	2.81237e+07	1.69121e+07	1.18617e+07	1.20364e+07	1.28667e+07	4.42482e+07	4.23399e+07
556	Neg_16843	502	5	21.6913	447.054	Glucobrassicin (3-Indolylmethylglucosinolate)	C05837	C16H20O9S2N2	[M-H]-	447.054	1.67765	Indolic GLS	2	magma_kegg		4.45663e+07	2.26838e+08	8.41464e+07	3.21019e+07	1.22006e+08	6.33781e+07	3.60024e+06	2.02878e+07	9.12604e+06	2.89153e+06	4.15308e+06	4.92349e+06	5.0899	1.88812	3.80058	1.97428	4.88539e+07	4.68334e+07	4.87231e+07	3.38547e+07	2.27512e+08	2.17681e+08	2.80166e+08	1.81994e+08	6.24259e+07	9.53973e+07	1.02539e+08	7.62237e+07	4.05235e+07	2.75486e+07	2.93953e+07	3.09403e+07	1.24435e+08	1.16099e+08
898	Neg_23561	374	5	34.5433	477.065	neoglucobrassicin (1-Methoxy-3-indolylmethyl glucosinolate)	C08424	C17H22O10S2N2	[M-H]-	477.064	0.781865	Indolic GLS	2	magma_kegg		1.185e+08	4.1605e+08	1.42174e+08	1.06991e+08	3.80326e+08	1.59092e+08	1.00594e+07	4.64946e+07	1.37614e+07	7.3676e+06	1.38129e+07	9.62757e+06	3.51097	1.19978	3.55475	1.48697	1.10906e+08	1.21088e+08	1.4485e+08	9.71554e+07	4.35296e+08	4.1165e+08	5.21412e+08	2.95841e+08	1.04897e+08	1.6247e+08	1.63448e+08	1.37879e+08	1.20688e+08	8.6083e+07	1.11155e+08	1.10037e+08	3.9554e+08	3.42833e+08
938	Neg_24587	334	5	36.1661	693.205	Sesaminol glucosyl-(1->2)-glucoside	HMDB41210	C32H38O17	[M-H]-	693.204	1.65782	lignan	2	magma_HMDB		760301	3.19315e+06	1.33964e+06	1.01219e+06	3.75079e+06	1.70752e+06	41746.1	277097	89470.3	23637.8	211761	105434	4.19985	1.76199	3.70563	1.68696	786047	860950	729752	664455	2.63998e+06	3.66308e+06	3.67697e+06	2.79255e+06	1.1246e+06	1.32327e+06	1.56205e+06	1.34865e+06	982404	987195	1.08255e+06	996605	4.16168e+06	3.29177e+06
974	Neg_25076	326	5	37.395	693.205	Neocuscutoside C	HMDB41599	C32H38O17	[M-H]-	693.204	0.734271	lignan glycosides	2	Metlin MS		43012.1	252741	88861.3	53784.8	239326	105603	3439.86	24724.4	11002.2	1508.07	15779.5	7964.61	5.87605	2.06596	4.44969	1.96344	49128.5	34871	48282.2	39766.8	219586	323285	250793	217302	69755	99480.5	114770	71440	57120.9	50269.5	55250.8	52498.1	258548	195883
208	Neg_8712	439	5	4.46031	315.073	Ginnalin B		C13H16O9	[M-H]-	315.073	-0.736338	phenolic glycosides	2	Metlin MS		346552	2.50689e+06	400751	455914	1.95345e+06	502263	39496.2	122449	23849.6	42570.4	287124	29260.8	7.2338	1.1564	4.28469	1.10166	393052	346139	411527	235488	2.69786e+06	2.73681e+06	2.26474e+06	2.32813e+06	346969	450344	429909	375781	570448	385192	397487	470528	1.70502e+06	1.46087e+06
679	Neg_19230	511	5	26.6355	415.125	2-Hydroxybenzaldehyde O-[xylosyl-(1->6)-glucoside]	HMDB0034157	C18H24O11	[M-H]-	415.125	1.43906	phenolic glycosides	2	magma_HMDB	Candidate score "0"	89252.5	513101	180192	108460	288946	179414	5710.4	49044.4	12496.5	4735.13	25996.4	22483.3	5.74887	2.0189	2.66409	1.6542	96255.5	89501.7	98194.3	73058.6	489560	577989	600234	384620	150513	194516	206173	169565	120561	102744	99369.4	111164	358785	298385
338	Neg_11834	492	5	12.9947	371.099	Dihydroferulic acid 4-O-glucuronide	HMDB41723	C16H20O10	[M-H]-	371.098	0.458477	phenolic glycosides	2	magma_HMDB		4.95207e+06	2.33886e+07	9.47446e+06	4.3656e+06	1.674e+07	8.75277e+06	355165	1.70023e+06	919122	147638	1.60509e+06	691830	4.72299	1.91323	3.83453	2.00494	5.53507e+06	5.34275e+06	4.98829e+06	3.94218e+06	2.47558e+07	2.2564e+07	2.71168e+07	1.91177e+07	7.62115e+06	9.53312e+06	1.19669e+07	8.77666e+06	4.28762e+06	4.74323e+06	4.40015e+06	4.0314e+06	2.14624e+07	1.59971e+07
1186	Pos_42950	346	5	38.8774	339.108	Hydrojuglone glucoside	HMDB0041191	C16H18O8	[M+H]+	339.107	0.476097	phenolic glycosides	2	magma_HMDB		299525	2.64947e+06	1.11294e+06	549362	2.90878e+06	1.43378e+06	42642.8	239587	125535	55283.3	290966	222396	8.84557	3.71567	5.29483	2.60991	406420	326777	250539	214365	2.41626e+06	3.2058e+06	2.85718e+06	2.11863e+06	1.02475e+06	1.24718e+06	1.37473e+06	805084	705508	489830	455876	546233	3.78066e+06	2.6219e+06
268	Pos_10815	364	5	10.1532	355.102	Chlorogenic acid	C00852	C16H18O9	[M+H]+	355.102	0.202758	quinic acids and derivatives	2	magma_kegg	UV λmax 325 confirmed	1.64734e+07	6.39549e+07	3.10873e+07	2.67483e+07	6.22543e+07	3.76021e+07	704452	4.06519e+06	2.09834e+06	1.20228e+06	2.70347e+06	1.91053e+06	3.88231	1.88712	2.32741	1.40578	1.70105e+07	1.73364e+07	1.71772e+07	1.43695e+07	6.69504e+07	6.26912e+07	7.27387e+07	5.3439e+07	2.63325e+07	3.11173e+07	3.65372e+07	3.03622e+07	2.98229e+07	2.42083e+07	2.72868e+07	2.56754e+07	7.02142e+07	5.86712e+07
1161	Pos_42077	254	5	37.927	369.118	O-Feruloylquinic acid I	C02572	C17H20O9	[M+H]+	369.118	0.923824	quinic acids and derivatives	2	magma_kegg		2.67177e+06	5.99177e+06	3.24993e+06	3.58558e+06	5.5332e+06	4.39147e+06	357698	565721	321873	619266	240609	650917	2.24262	1.2164	1.54318	1.22476	3.48939e+06	2.88324e+06	2.53975e+06	1.77471e+06	5.71595e+06	6.21551e+06	7.38033e+06	4.65527e+06	2.80645e+06	3.00437e+06	4.20636e+06	2.98255e+06	5.39332e+06	2.58253e+06	3.22854e+06	3.13793e+06	6.13887e+06	5.02172e+06
450	Neg_14115	482	5	17.5889	367.104	O-Feruloylquinic acid II	C02572	C17H20O9	[M-H]-	367.103	-0.66771	quinic acids and derivatives	2	MAGMa-KEGG		8.40136e+06	1.75932e+07	1.11159e+07	1.01907e+07	1.45229e+07	1.1713e+07	553855	763047	213363	465430	646283	678889	2.09409	1.3231	1.42511	1.14938	9.01557e+06	7.98961e+06	9.54788e+06	7.05238e+06	1.78395e+07	1.75074e+07	1.93712e+07	1.56548e+07	1.13044e+07	1.15794e+07	1.09938e+07	1.05858e+07	1.13339e+07	9.05778e+06	1.01185e+07	1.02526e+07	1.61544e+07	1.49596e+07
860	Neg_22624	225	5	33.1383	577.157	Glucofrangulin A	C16802	C27H30O14	[M-H]-	577.156	0.823001	quinone	2	magma_kegg	in Broccoli?	112231	364471	19947.4	74541.4	116458	141387	14282.3	126705	3776.32	34664.1	6288.11	64265.5	3.24751	-5.62636	1.56232	1.89676	134111	123433	121149	70230.5	642030	85998.4	226975	502882	16229.2	22900.6	28940.5	11719.2	149850	11735.5	116896	19684.4	134839	108684
481	Neg_14818	508	5	18.7366	355.104	Gentiopicroside	C09782	C16H20O9	[M-H]-	355.103	1.11798	secoiridoid	2	magma_kegg		1.38611e+07	4.90355e+07	2.41854e+07	1.63517e+07	3.08117e+07	2.17181e+07	1.08542e+06	2.36613e+06	1.4381e+06	960606	2.47892e+06	1.57473e+06	3.53763	1.74484	1.88432	1.32819	1.70318e+07	1.26834e+07	1.34611e+07	1.22681e+07	4.82582e+07	5.58112e+07	4.71937e+07	4.48791e+07	2.25287e+07	2.59198e+07	2.72338e+07	2.10594e+07	1.83716e+07	1.616e+07	1.38119e+07	1.70631e+07	3.74516e+07	3.15719e+07
886	Neg_23140	249	5	34.1268	469.082	(Z)-Resveratrol 3-(3''-sulfoglucoside)/ (E)-Resveratrol 3-glucoside 4'-sulfate/ (Z)-Resveratrol 3-(4''-sulfoglucoside)	HMDB0037075	C20H22O11S	[M-H]-	469.081	1.66445	stilbene	2	magma_HMDB		315016	885708	632955	410274	936952	711826	24990.3	131618	104080	30496.4	77739.3	94773.2	2.81163	2.00928	2.28372	1.735	389333	298090	281978	290661	891075	754450	1.25089e+06	646413	616495	913663	590298	411363	424238	478504	330888	407466	794278	1.15743e+06
99	Neg_5084	453	5	2.08619	195.051	D-Gluconic acid	C00257	C6H12O7	[M-H]-	195.051	-0.933089	sugar acids and derivatives	2	magma_kegg		5.67708e+07	1.81231e+08	9.56074e+07	6.76796e+07	1.41935e+08	1.02937e+08	1.64096e+06	2.1445e+07	6.0586e+06	2.43912e+06	1.84646e+07	9.04035e+06	3.19233	1.6841	2.09716	1.52094	6.12737e+07	5.55832e+07	5.67148e+07	5.35115e+07	1.89281e+08	2.34864e+08	1.68763e+08	1.32018e+08	8.24573e+07	1.10259e+08	9.99445e+07	8.97692e+07	7.29456e+07	7.07e+07	6.32156e+07	6.38571e+07	1.95827e+08	1.20232e+08
154	Neg_6956	264	5	2.99669	191.02	Citric acid	C00158	C6H8O7	[M-H]-	191.02	-2.44477	tricarboxylic acids and derivatives	2	magma_kegg, Metlin (experimental mass confirmed)		2.81449e+07	8.1417e+07	6.65066e+07	2.66032e+07	8.22139e+07	6.07413e+07	3.82131e+06	1.75586e+06	3.02525e+06	2.82526e+06	3.69161e+06	7.67931e+06	2.89278	2.36301	3.09037	2.28323	3.92832e+07	2.53374e+07	2.60511e+07	2.19079e+07	7.95428e+07	8.23151e+07	8.59176e+07	7.78925e+07	7.47226e+07	6.44695e+07	6.65059e+07	6.03282e+07	3.39969e+07	2.1657e+07	2.79928e+07	2.27663e+07	8.63318e+07	8.40688e+07
1093	Pos_39529	372	5	35.4269	501.16	Nocardicin A	C01941	C23H24N4O9	[M+H]+	501.162	-4.4412		2	MAGMa_KEGG		2.51166e+07	1.14467e+08	5.4883e+07	4.11522e+07	1.21394e+08	6.74541e+07	1.36901e+06	6.63495e+06	3.19357e+06	1.58393e+06	4.69289e+06	3.31968e+06	4.55743	2.18513	2.94987	1.63913	2.84382e+07	2.62054e+07	2.34336e+07	2.23891e+07	1.11737e+08	1.21066e+08	1.27859e+08	9.72062e+07	4.96305e+07	5.66515e+07	6.31673e+07	5.00829e+07	4.22646e+07	4.50517e+07	3.93894e+07	3.79033e+07	1.34141e+08	1.16005e+08
348	Pos_13851	578	7	14.8717	339.108	p-Coumaroyl quinic acid/ 1-Caffeoyl-4-deoxyquinic acid (C10432)/ 4-p-Coumaroylquinic acid (C10441)	C12208	C16H18O8	[M+H]+	339.107	0.38041	quinic acids and derivatives	2	magma_kegg		6.43548e+06	2.4799e+07	1.16558e+07	2.29909e+07	4.84574e+07	3.08563e+07	300718	1.40823e+06	814567	1.14819e+06	933370	1.186e+06	3.85349	1.81118	2.10768	1.34211	6.88561e+06	6.31106e+06	6.9106e+06	5.63464e+06	2.45371e+07	2.54969e+07	2.79831e+07	2.11791e+07	1.0109e+07	1.20068e+07	1.37918e+07	1.07157e+07	2.58099e+07	2.05017e+07	2.37267e+07	2.19252e+07	4.95104e+07	4.69292e+07
143	Neg_6641	603	7	2.76879	133.014	Malic acid	C00711	C4H6O5	[M-H]-	133.015	-4.37545	hydroxy acids and derivatives	2	magma_kegg, Metlin (experimental mass confirmed)		4.58964e+06	9.37951e+06	1.06013e+07	8.27595e+06	2.06164e+07	1.66994e+07	145241	2.98652e+06	2.0803e+06	380636	668733	937912	2.04363	2.30984	2.49112	2.01782	4.70876e+06	4.6249e+06	4.17646e+06	4.84845e+06	2.43455e+06	8.91832e+06	9.13537e+06	1.70298e+07	7.42532e+06	1.41647e+07	1.42203e+07	6.59499e+06	7.54534e+06	8.60607e+06	9.18881e+06	7.76359e+06	2.05378e+07	2.05131e+07
651	Pos_24530	694	10	24.0918	306.098	Ascorbigen	HMDB29839	C15H15NO6	[M+H]+	306.097	1.24726	isosorbides	2	magma_HMDB		2.31583e+06	1.63362e+07	6.36315e+06	1.67525e+06	1.08253e+07	4.60522e+06	279944	3.03399e+06	971606	420197	1.30145e+06	687911	7.05412	2.74767	6.46188	2.74897	1.90217e+06	2.85522e+06	2.73798e+06	1.76796e+06	1.31764e+07	2.3762e+07	9.94671e+06	1.84595e+07	3.45525e+06	7.4549e+06	7.39617e+06	7.14628e+06	1.07818e+06	1.03538e+06	1.75159e+06	2.83587e+06	1.37604e+07	1.16648e+07
319	Neg_11372	741	11	12.1124	406.031	Glucoiberverin (3-Methylthiopropyl glucosinolate)	C08412	C11H21NO9S3	[M-H]-	406.031	1.33734	Aliphatic GLS	2	magma_kegg		3.24019e+06	7.59913e+06	3.32822e+06	35142.4	44150.6	108342	551230	1.23411e+06	350536	3465.35	4562.6	79514.9	2.34527	1.02717	1.25633	3.08294	2.90999e+06	4.47244e+06	3.68693e+06	1.89141e+06	6.93653e+06	7.00924e+06	1.11154e+07	5.33531e+06	2.44559e+06	3.08835e+06	3.82648e+06	3.95246e+06	37990.6	36750.2	25057	40771.8	57476.7	42644.4
1060	Pos_38137	748	11	34.3613	191.143	beta-Damascenone	HMDB13804	C13H18O	[M+H]+	191.143	-0.267862	enones	2	magma_HMDB		4.05051e+06	1.06961e+07	4.34631e+06	2.69351e+06	4.13531e+06	1.97429e+06	402627	1.34733e+06	110790	329801	60074.4	113577	2.64067	1.07303	1.53529	-1.36429	3.82478e+06	3.35471e+06	5.21327e+06	3.80929e+06	9.79513e+06	1.01394e+07	1.45553e+07	8.29442e+06	4.21861e+06	4.20265e+06	4.29024e+06	4.67373e+06	3.67715e+06	2.41802e+06	2.26511e+06	2.41377e+06	4.3027e+06	4.10355e+06
391	Pos_15217	770	12	16.2155	165.055	p-Coumaric acid/ Phenylpyruvic acid (C00166)/ trans-3-Hydroxycinnamate (C12621)/ 2-Coumaric acid (C01772)	C00811	C9H8O3	[M+H]+	165.055	1.32078	hydroxycinnamic acids	3	magma_kegg		2.33946e+06	5.32227e+06	3.93864e+06	3.80739e+06	4.52717e+06	4.66736e+06	450219	699187	463688	385387	35797.7	285720	2.275	1.68357	1.18905	1.22587	3.41427e+06	1.3975e+06	2.70952e+06	1.83654e+06	4.8143e+06	7.2523e+06	3.95088e+06	5.27159e+06	5.04422e+06	3.98305e+06	3.95297e+06	2.77434e+06	4.41188e+06	3.33397e+06	4.51131e+06	2.97239e+06	4.57664e+06	4.50614e+06
416	Neg_13409	772	12	16.2073	325.094	4-O-beta-D-Glucosyl-4-hydroxycinnamate/ p-Coumaroyl-D-glucose (C16827)/ trans-beta-D-Glucosyl-2-hydroxycinnamate (C05158)	C04415	C15H18O8	[M-H]-	325.094	0.101509	hydroxycinnamic acids	3	magma_kegg		1.40335e+06	4.06159e+06	2.34764e+06	2.14283e+06	1.91413e+06	2.43692e+06	306603	524161	261692	179731	105071	105456	2.89421	1.67288	-1.11948	1.13724	2.0824e+06	745085	1.7346e+06	1.05133e+06	3.75308e+06	5.57943e+06	3.16822e+06	3.74564e+06	3.00275e+06	2.50239e+06	2.08538e+06	1.80002e+06	2.57383e+06	1.91615e+06	2.29525e+06	1.7861e+06	2.16539e+06	2.00719e+06
109	Neg_5422	773	12	2.17607	209.067	Coriose/ L-glycero-D-manno-Heptopyranose (C21043)/ Sedoheptulose (C02076)	C19612	C7H14O7	[M-H]-	209.067	-2.90337	glycoside	3	magma_kegg		9.0171e+06	2.0286e+07	1.5262e+07	1.01416e+07	1.65488e+07	1.58835e+07	397059	2.11841e+06	611262	619358	1.24848e+06	3.51189e+06	2.24972	1.69256	1.63177	1.56617	9.62697e+06	9.77328e+06	8.2473e+06	8.42084e+06	2.2136e+07	2.52425e+07	1.8044e+07	1.57214e+07	1.4752e+07	1.63276e+07	1.61953e+07	1.3773e+07	1.18349e+07	9.68335e+06	8.9063e+06	1.01418e+07	1.93806e+07	1.48179e+07
120	Neg_5798	774	12	2.25043	110.985	Hydroxymethylphosphonate	C06455	CH5O4P	[M-H]-	110.986	-3.49595	phosphonic acid	2	magma_kegg		4.09214e+06	1.21076e+07	6.90905e+06	3.38487e+06	6.84637e+06	7.4137e+06	418929	2.9522e+06	808925	315707	934113	1.21321e+06	2.95874	1.68837	2.02264	2.19025	3.88582e+06	3.17408e+06	4.11187e+06	5.19678e+06	1.60778e+07	1.80785e+07	8.50752e+06	5.76638e+06	7.95017e+06	8.62421e+06	5.64946e+06	5.41237e+06	4.31197e+06	3.25512e+06	3.01647e+06	2.95593e+06	9.51592e+06	5.15387e+06
194	Neg_8234	776	13	3.93082	173.009	trans-Aconitic acid/ Dehydroascorbic acid (C05422)	C02341	C6H6O6	[M-H]-	173.01	-3.21369	tricarboxylic acids and derivatives	3	magma_HMDB		110924	234759	408653	254808	623612	435982	24547	64967.4	45949.7	28086.9	24883.3	150433	2.11639	3.68407	2.44738	1.71102	119761	63162.9	85033.4	175740	136941	140558	413748	247789	356153	528236	430022	320201	265260	222282	329310	202380	601615	601224
[truncated: 6 more columns]
