# Supplementary material for: Effects of Sulfur Assimilation in Pseudomonas fluorescens SS101 on Growth, Defense, and Metabolome of Different Brassicaceae
Source: Biomolecules. 2021 Nov 16;11(11):1704. doi: 10.3390/biom11111704 (PMC8615669; doi:10.3390/biom11111704)
Supplement: Supplementary file 1 [file biomolecules-11-01704-s001.zip › biomolecules-1410424-rev done-supplementary-tableS1-5.pdf]

## Supplementary tables

**Table S1.** Results of the analysis of variance ANOVA (type II) of phenotypic changes induced in tow Broccoli cultivars by root inoculation by *Pseudomonas fluorescens* strain SS101 or its *cysH* mutant 20H12. Shown are whole plant, shoot and root biomass changes in the two broccoli cultivars after root inoculation with *Pf*SS101: *Pseudomonas fluorescens* SS101, 20H12: *cysH*-mutant of *Pf*SS101.

| Sample                                    | Factor                  | Df | Sum Sq | Mean Sq | F value | Pr(>F)   |     |
|-------------------------------------------|-------------------------|----|--------|---------|---------|----------|-----|
| Whole plant fresh biomass relative change | Broccoli cultivars      | 2  | 11513  | 5757    | 94.559  | 2.83E-10 | *** |
|                                           | Bacteria (WT vs Mutant) | 1  | 260    | 260     | 4.263   | 0.0537   | .   |
|                                           | Broccoli cultivars:     | 2  | 3536   | 1768    | 29.043  | 2.32E-06 | *** |
|                                           | Bacteria                |    |        |         |         |          |     |
|                                           | Residuals               | 18 | 1096   | 61      |         |          |     |
| Shoot fresh biomass relative change       | Broccoli cultivars      | 2  | 15124  | 7562    | 103.416 | 1.35E-10 | *** |
|                                           | Bacteria                | 1  | 699    | 699     | 9.554   | 0.0063   | **  |
|                                           | Broccoli cultivars:     |    |        |         |         |          |     |
|                                           | Bacteria                | 2  | 4373   | 2186    | 29.899  | 1.90E-06 | *** |
|                                           | Residuals               | 18 | 1316   | 73      |         |          |     |
| Root fresh biomass relative change        | Broccoli cultivars      | 2  | 4453   | 2226    | 8.477   | 0.00255  | **  |
|                                           | Bacteria                | 1  | 3883   | 3883    | 14.783  | 0.00119  | **  |
|                                           | Broccoli cultivars:     |    |        |         |         |          |     |
|                                           | Bacteria                | 2  | 2829   | 1415    | 5.386   | 0.01468  | *   |
|                                           | Residuals               | 18 | 4728   | 263     |         |          |     |

Significance codes: \*\*\* 0, \*\* 0.001, \* 0.01.

**Table S2.** Population density of *Pseudomonas fluorescens* SS101 and *cysH*-mutant 20H12 on roots of *Arabidopsis* and two Broccoli cultivars, Coronado and Malibu, at 11 dpi. *Pf*SS101: *Pseudomonas fluorescens* SS101, 20H12: *cysH*-mutant of *Pf*SS101.

| Plant species                                | Population density (Cfu/mg*) |                           |
|----------------------------------------------|------------------------------|---------------------------|
|                                              | <i>Pf</i> SS101              | 20H12                     |
| <i>Arabidopsis thaliana</i> Col-0            | $9.9 \pm 0.5 \times 10^5$    | $5.3 \pm 0.3 \times 10^6$ |
| <i>Brassica oleracea</i> var. <i>italica</i> | Coronado                     | $6.9 \pm 0.5 \times 10^5$ |
|                                              | Malibu                       | $2.2 \pm 0.3 \times 10^5$ |

CFU: Colony forming unit

\*Values represent the average of 3 replicates  $\pm$  SE of three replicates

**Table S3.** Effects of root treatment of two Broccoli cultivars with the beneficial rhizobacterium *Pseudomonas fluorescens* SS101, or with its *cysH*-mutant on the phylosphere population density of two pathovars of the bacterial leaf pathogen *Xanthomonas campestris* at 11 dpi. The two Broccoli cultivars are Coronado and Malibu; the two pathovars of *X. campestris* are *Xca*: *X. campestris* pv. *armoraciae*, and *Xcc*: *X. campestris* pv. *campestris*

| Broccoli cultivars | Rhizobacteria pretreatments | Population density (Cfu/mg*) |                           |
|--------------------|-----------------------------|------------------------------|---------------------------|
|                    |                             | <i>Xca</i>                   | <i>Xcc</i>                |
| Coronado           | Control                     | $4.4 \pm 3.3 \times 10^5$    | $1.5 \pm 1.0 \times 10^6$ |
|                    | <i>Pf</i> SS101             | $1.2 \pm 0.6 \times 10^5$    | $4.5 \pm 1.5 \times 10^5$ |
|                    | 20H12                       | $5.8 \pm 1.9 \times 10^5$    | $6.4 \pm 2.1 \times 10^5$ |
| Malibu             | Control                     | $1.6 \pm 1.1 \times 10^6$    | $1.1 \pm 6.2 \times 10^6$ |
|                    | <i>Pf</i> SS101             | $2.7 \pm 0.3 \times 10^5$    | $2.1 \pm 0.1 \times 10^4$ |
|                    | 20H12                       | $8.5 \pm 5.4 \times 10^5$    | $4.0 \pm 1.2 \times 10^5$ |

Cfu: Colony forming unit

\*Values represent the average of 3 replicates  $\pm$  SE of three replicates

**Table S4.** Results of the beta regression analysis of disease severity caused by *Xanthomonas* on leaves two Broccoli cultivars (Coronado and Malibu) that were pretreated on the roots with *Pseudomonas fluorescens* SS101 or its *cysH*-mutant.

|            | model term             | df1 | df2 | F.ratio | p.value |
|------------|------------------------|-----|-----|---------|---------|
| <i>Xca</i> | Rhizobacteria          | 2   | Inf | 43.681  | <.0001  |
|            | Genotype               | 1   | Inf | 7.058   | 0.0079  |
|            | Rhizobacteria:Genotype | 2   | Inf | 17.234  | <.0001  |
| <i>Xcc</i> | Rhizobacteria          | 2   | Inf | 2.878   | 0.0562  |
|            | Genotype               | 1   | Inf | 6.523   | 0.0106  |
|            | Rhizobacteria:Genotype | 2   | Inf | 2.253   | 0.105   |

**Table S5.** Level of three glucosinolates (GLSs: glucoiberin, glucoraphanin and glucobrassicin) in the shoot of the two Broccoli cultivars, Coronado and Malibu. Presented here are the average levels of these three GLSs in untreated plants (control) and their fold changes in plants treated with *PfSS101* or its *cysH*-mutant. *PfSS101*: *Pseudomonas fluorescens* SS101, 20H12: *cysH*-mutant of *PfSS101*.

| Compound       | GLS type  | Average (n=4)       |                   | Fold change*   |       |                |       |
|----------------|-----------|---------------------|-------------------|----------------|-------|----------------|-------|
|                |           | Control of Coronado | Control of Malibu | Coronado       |       | Malibu         |       |
|                |           |                     |                   | <i>PfSS101</i> | 20H12 | <i>PfSS101</i> | 20H12 |
| Glucobrassicin | Indole    | 44566275            | 32101930          | 5.09           | 1.89  | 3.80           | 1.97  |
| Glucoiberin    | Aliphatic | 443556386           | 8324029           | 1.15           | -1.12 | 1.45           | 1.30  |
| Glucoraphanin  | Aliphatic | 659942362           | 575245511         | 1.22           | -1.08 | 1.16           | -1.03 |

\* Fold changes were calculated relative to the untreated controls of each of the two Broccoli cultivars

## Supplementary tables presented as excel files

**Table S6.** Annotation of Arabidopsis shoot metabolites that showed significant change in their abundance after root inoculation with rhizobacterium PfSS101: *Pseudomonas fluorescens* SS101, or its mutant 20H12: *cysH*-mutant of PfSS101. Fold changes were calculated by dividing the abundance of each metabolite to the non-treated control. Cluster numbers are associated with the cluster in **Figure 3B**.

**Table S7.** Annotation of Broccoli shoot metabolites that showed significant change in their abundance after root inoculation with rhizobacterium PfSS101: *Pseudomonas fluorescens* SS101, or its mutant 20H12: *cysH*-mutant of PfSS101. Fold changes were calculated by dividing the abundance of each metabolite to the non-treated control. Cluster numbers are associated with the cluster in **Figure 4B**.
